# Supplementary material
Source: Research Square preprint supplement (doi:10.21203/rs.3.rs-8856508/v1)

**Supplementary Materials and Methods**

**Soil chemical property analysis:**

Soil pH was determined using a PHS-3B pH meter at a soil-to-water ratio of 1:2.5. Total nitrogen (TN) was measured using the Kjeldahl method. Available potassium (AK) was extracted with 1 mol L⁻¹ ammonium acetate and determined by flame photometry, while available phosphorus (AP) was extracted with 0.5 mol L⁻¹ NaHCO₃ (pH 8.5) and measured by the molybdenum–antimony colorimetric method. Dissolved organic nitrogen (DON) was extracted at a soil-to-water ratio of 1:5, filtered, and directly measured using a total organic carbon (TOC) analyzer (multi N/C 3100, Analytik Jena, Germany). The particulate organic matter fraction (> 0.053 mm) obtained during particulate organic carbon (POC) separation (Materials and Methods 1.3) was analyzed for nitrogen content by the Kjeldahl method to determine particulate organic nitrogen (PON). Soil microbial biomass nitrogen (MBN) was determined using the chloroform fumigation–extraction method. The soil C: N was calculated as the ratio of SOC to TN.

Table S1 Above-ground fresh biomass and nutrient contents of different green manures. Values represent means ± SD (n = 3). Different lowercase letters indicate significant differences among green manure types (*p* < 0.05). CK: no green manure; CJ: *Crotalaria juncea*; CP: *Crotalaria pallida*; SC: *Sesbania cannabina*; TN: total nitrogen; TP: total phosphorus; TK: total potassium; TC: total carbon.

| Plant indicators | CJ | CP | SC |
| --- | --- | --- | --- |
| Biomass (t hm⁻²) | 7.34±0.18b | 10.00±0.20a | 10.69±0.55a |
| TN (g kg⁻¹) | 19.43±0.55c | 22.27±0.29b | 32.93±1.12a |
| TP (g kg⁻¹) | 3.50±0.41a | 3.70±0.56a | 4.37±0.27a |
| TC (g kg⁻¹) | 427.10±23.76c | 480.16±7.79b | 530.81±17.49a |
| TK (g kg⁻¹) | 29.39±1.13a | 21.35±0.62b | 19.57±0.89b |
| C:N | 21.97±0.61a | 21.57±0.47a | 16.12±0.31b |
| Nodule nitrogenase activity  (μmol min⁻¹ g⁻¹) | 1.77±0.27c | 4.23±0.27a | 2.64±0.15b |

Table S2 Overview of metagenomic sequencing results for different green manure soils. Abbreviations are same as described in Table S1. Raw reads: the number of sequences of raw reads; Clean reads: the number of sequences after quality control; Contigs: the number of sequences assembled by splicing; Contigs base (bp): total sequence length of contigs; ORFs: the number of sequences of open reading frames; Catalog genes: number of genes in a non-redundant gene catalog.

| Stage | Sample | Raw reads | Clean reads | Contigs | Contigs base (bp) | ORFs | Catalog gene | |
| --- | --- | --- | --- | --- | --- | --- | --- | --- |
| Bacteria | Fungi |
| Cultivation stage | CK_1 | 72100248 | 70315656 | 781016 | 443885770 | 963962 | 7694730 | 3505 |
| CK_2 | 77414332 | 75549140 | 825626 | 475046218 | 1020815 |
| CK_3 | 71035940 | 69214684 | 729465 | 418517986 | 904498 |
| CJ_1 | 73346904 | 71549252 | 850392 | 488070575 | 1048033 |
| CJ_2 | 79398586 | 77478876 | 894440 | 531526111 | 1117385 |
| CJ_3 | 76197606 | 73184644 | 785479 | 445383963 | 959039 |
| CP_1 | 75537578 | 73251928 | 828805 | 470409154 | 1023985 |
| CP_2 | 79732028 | 77641542 | 881479 | 502214395 | 1088399 |
| CP_3 | 70348758 | 68542108 | 718357 | 403140601 | 880724 |
| SC_1 | 74805580 | 71907732 | 819318 | 474588344 | 1012086 |
| SC_2 | 82209966 | 78841758 | 959340 | 540047479 | 1183161 |
| SC_3 | 82384888 | 79203114 | 880939 | 494247980 | 1077797 |
| Incorporation stage | CK_1 | 74275700 | 72270392 | 915882 | 557425508 | 1168180 |
| CK_2 | 73938156 | 72126622 | 880430 | 505607177 | 1092997 |
| CK_3 | 71584082 | 69790380 | 886898 | 516068796 | 1111059 |
| CJ_1 | 72322122 | 70096794 | 880758 | 515688589 | 1099461 |
| CJ_2 | 71770858 | 69969684 | 916910 | 561196167 | 1166918 |
| CJ_3 | 81107072 | 79268178 | 1108207 | 680520243 | 1416168 |
| CP_1 | 68773772 | 66986404 | 731592 | 426605245 | 909499 |
| CP_2 | 71666210 | 69885322 | 761290 | 438834085 | 944159 |
| CP_3 | 73932688 | 72062658 | 812699 | 471742757 | 1012213 |
| SC_1 | 75363344 | 73432150 | 936529 | 561550627 | 1185651 |
| SC_2 | 77564730 | 75757106 | 981238 | 564153669 | 1222399 |
| SC_3 | 75433630 | 73673148 | 943972 | 563254544 | 1192396 |

Table S3 Summary of metagenomic sequencing information of different green manure soils based on the CAZyme database. Reads numbers: gene abundance; Gene counts: the number of genes; GH: Glycoside Hydrolases; GT: Glycosyl Transferases; CE: Carbohydrate Esterases; AA: Auxiliary Activities; PL: Polysaccharide Lyases; CBM: Carbohydrate-Binding Modules.

| Stage | Class | Reads numbers | | | | | | | | | Gene counts | |
| --- | --- | --- | --- | --- | --- | --- | --- | --- | --- | --- | --- | --- |
| All samples | Bacteria | | | | Fungi | | | | Total | |
| CK | CJ | CP | SC | CK | CJ | CP | SC | Bacteria | Fungi |
| Cultivation stage | AA | 1001102 | 79868 | 83508 | 84547 | 75553 | 12 | 14 | 5 | 13 | 33092 | 8 |
| CBM | 254956 | 20308 | 20826 | 20791 | 18349 | 18 | 8 | 18 | 13 | 10719 | 5 |
| CE | 1442240 | 117020 | 118843 | 124718 | 112821 | 0 | 0 | 0 | 1 | 43377 | 1 |
| GH | 3329350 | 265116 | 277192 | 288650 | 259467 | 51 | 43 | 39 | 52 | 117823 | 40 |
| GT | 3507850 | 277209 | 286583 | 299579 | 258933 | 15 | 9 | 9 | 25 | 101836 | 8 |
| PL | 282190 | 22507 | 23711 | 24270 | 19641 | 8 | 6 | 1 | 9 | 10105 | 4 |
| Total | 9817688 | 9540030 | | | | 1110 | | | | 316952 | 66 |
| Incorporation stage | AA | 1083816 | 94711 | 79224 | 87902 | 87926 | 7 | 9 | 14 | 12 | 33184 | 9 |
| CBM | 260520 | 22713 | 19617 | 20162 | 19559 | 19 | 16 | 20 | 15 | 10614 | 4 |
| CE | 1520266 | 135798 | 112871 | 126310 | 123092 | 0 | 1 | 1 | 1 | 43091 | 1 |
| GH | 3493638 | 310827 | 253737 | 294335 | 285818 | 44 | 49 | 65 | 49 | 117086 | 37 |
| GT | 3730816 | 332295 | 271464 | 302212 | 289661 | 13 | 5 | 17 | 4 | 101229 | 7 |
| PL | 281080 | 25079 | 22011 | 21349 | 21121 | 7 | 13 | 17 | 9 | 9992 | 5 |
| Total | 10370136 | 10079376 | | | | 1218 | | | | 315196 | 63 |

Table S4 Functional classification of CAZyme genes encoding for plant- and microbial-derived components degradation and the abundance of genes in green manure types. Most CAZyme families belong to glycosyl hydrolases (GH), Auxiliary Activities (AA), Carbohydrate Esterases (CE), Carbohydrate-Binding Module (CBMs).

|  | Components | CAZyme families |
| --- | --- | --- |
| Plant-derived | Cellulose | GH1 (β-glucosidase, EC 3.2.1.21); GH3 (β-glucosidase, EC 3.2.1.21); GH5 (cellulose β-1,4-cellobiosidase, EC 3.2.1.91); GH6 (cellobiohydrolase, EC 3.2.1.91); GH8 (cellulase, EC 3.2.1.4); GH9 (endoglucanase, EC 3.2.1.4); GH12 (endoglucanase, EC 3.2.1.4); GH115 (xylan α-1,2-glucuronidase, 3.2.1.131); CBM2 (cellulose-binding); CBM3 (cellulose-binding); CBM4 (cellulose-binding); CBM8 (cellulose-binding); CBM8 (cellulose-binding); CBM63 (cellulose-binding) |
| Hemicellulose | CE1 (acetyl xylan esterase, EC 3.1.1.72); CE2 (acetyl xylan esterase, EC 3.1.1.72); CE3 (acetyl xylan esterase, EC 3.1.1.72); CE4 (acetyl xylan esterase, EC 3.1.1.72); CE5 (acetyl xylan esterase, EC 3.1.1.72); CE6 (acetyl xylan esterase, EC 3.1.1.72); CE7 (acetyl xylan esterase, EC 3.1.1.72); CE12 (pectin acetylesterase, EC 3.1.1.-); CE16 (acetylesterase, EC 3.1.1.6); GH2 (β-mannosidase, EC 3.2.1.25); GH10 (endo-1,4-β-xylanase, EC 3.2.1.8); GH11 (endo-beta-1,4-xylanase, EC 3.2.1.8); GH16 (xyloglucan:xyloglucosyltransferase, EC 2.4.1.207); GH26 (β-mannanase, EC 3.2.1.78); GH30 (endo-β-1,4-xylanase, EC 3.2.1.8); GH31 (α-glucosidase, EC 3.2.1.20); GH36 (alpha-galactosidase, EC 3.2.1.22); GH39 (β-xylosidase, EC 3.2.1.37); GH43 (α-L-arabinofuranosidase, EC 3.2.1.55); GH44 (xyloglucanase, EC 3.2.1.151); GH51 (endoglucanase, EC 3.2.1.4); GH52 (beta-xylosidase, EC 3.2.1.37); GH62 (α-L-arabinofuranosidase, EC 3.2.1.55); GH67 (α-glucuronidase, EC 3.2.1.139); GH74 (endoglucanase, EC 3.2.1.4); GH95 (α-L-fucosidase, EC 3.2.1.51); GH120 (beta-xylosidase, EC 3.2.1.37); CBM6 (hemicellulose-binding); CBM13 (hemicellulose-binding); CBM22 (hemicellulose-binding); CBM42 (hemicellulose-binding); CBM61 (hemicellulose-binding) |
| Lignin | AA1 (Laccase/p-diphenol:oxygen oxidoreductase/ferroxidase, EC 1.10.3.2); AA2 (manganese peroxidase, EC 1.11.1.13; lignin peroxidase, EC 1.11.1.14; peroxidase, EC 1.11.1.-); AA3 (glucose 1-oxidase, EC 1.1.3.4); AA4 (vanillyl-alcohol oxidase, EC 1.1.3.38); AA5 (Oxidase, EC 1.1.3.-); AA6 (1,4-benzoquinone reductase, EC. 1.6.5.6); AA7 (glucooligosaccharide oxidase, EC 1.1.3.-) |
| Bacteria-derived | Peptidoglycan | GH102 (peptidoglycan lytic transglycosylase, EC 3.2.1.-); GH103 (peptidoglycan lytic transglycosylase, EC 3.2.1.-); GH104 (peptidoglycan lytic transglycosylase, EC 3.2.1.-); GH23 (peptidoglycan lyase, EC 4.2.2.-); GH24 (lysozyme, EC 3.2.1.17); GH25 (lysozyme, EC 3.2.1.17); GH73 (peptidoglycan hydrolase with endo-β-N-acetylglucosaminidase specificity, EC 3.2.1.-); GH108 (N-acetylmuramidase, EC 3.2.1.17) |
| Fungi-derived | Chitin | GH18 (chitinase, EC 3.2.1.14); GH19 (chitinase, EC 3.2.1.14); GH20 (β-1,6-N-acetylglucosaminidase, EC 3.2.1.-); GH48 (endo-beta-1,4-glucanase, EC 3.2.1.4); chitinase, EC 3.2.1.14); CBM5 (Chitin-binding); CBM12 (Chitin-binding) |
| Glucans | GH17 (glucan endo-1,3-β-glucosidase, EC 3.2.1.39); GH55 (endo-1,3-β-glucanase, EC 3.2.1.39); GH64 (β-1,3-glucanase, EC 3.2.1.39); GH81 (endo-beta-1,3-glucanase, EC 3.2.1.39); GH128 (endo-1,3-β-glucanase, EC 3.2.1.39); GH157 (endo-1,3-β-glucanase, EC 3.2.1.39); GH158 (endo-1,3-β-glucanase, EC 3.2.1.39) |

Table S5 Relative abundance changes of CAZyme genes encoding degradation of plant- and microbial-derived components. Abbreviations are same as described in Table S1. Values represent means ± SD (n = 3). Different lowercase letters indicate significant differences among green manure types (*p* < 0.05).

| Stage | Components | Plant-derived | | | Bacteria-derived | Fungi-derived | |
| --- | --- | --- | --- | --- | --- | --- | --- |
| Cellulose | Hemicellulose | Lignin | Peptidoglycan | Chitin | Glucans |
| Cultivation stage | CK | 9.79±0.10a | 52.81±0.41ab | 28.23±0.40a | 6.07±0.17b | 2.03±0.05b | 1.06±0.02b |
| CJ | 9.77±0.13a | 52.49±0.25b | 28.44±0.14a | 6.00±0.03b | 2.15±0.07a | 1.14±0.02a |
| CP | 9.97±0.33a | 52.70±0.20ab | 28.03±0.15ab | 6.03±0.08b | 2.18±0.06a | 1.10±0.04ab |
| SC | 9.56±0.27a | 53.23±0.23a | 27.54±0.44b | 6.28±0.06a | 2.28±0.06a | 1.12±0.04ab |
| Incorporation stage | CK | 10.39±0.33a | 51.68±0.12b | 28.66±0.48ab | 6.03±0.02d | 2.15±0.05b | 1.10±0.02a |
| CJ | 9.72±0.23b | 51.71±0.30b | 28.84±0.14a | 6.38±0.02c | 2.19±0.10ab | 1.13±0.02a |
| CP | 9.94±0.46ab | 52.23±0.34a | 27.90±0.71b | 6.51±0.03b | 2.30±0.06a | 1.11±0.04a |
| SC | 10.50±0.26a | 51.25±0.27b | 28.24±0.07ab | 6.61±0.03a | 2.20±0.01ab | 1.13±0.02a |

Table S6 Comparative analysis of the relative abundance of CAZyme families encoding plant- and microbial-derived components in different green manure soil. Abbreviations are same as described in Table S1. Values represent means ± SD (n = 3). Different lowercase letters indicate significant differences among green manure types (*p* < 0.05).

| Stage | Components | CAZyme families | CK | CJ | CP | SC |
| --- | --- | --- | --- | --- | --- | --- |
| Cultivation stage | Hemicellulose | CBM6 | 0.36±0.05a | 0.27±0.04ab | 0.27±0.06ab | 0.22±0.04b |
| CE1 | 13.52±0.10c | 13.88±0.15b | 14.09±0.17b | 15.01±0.05a |
| CE3 | 1.81±0.02b | 1.94±0.11ab | 1.89±0.05ab | 2.02±0.10a |
| CE4 | 6.91±0.01a | 6.52±0.07bc | 6.50±0.08c | 6.64±0.06b |
| CE7 | 5.19±0.02a | 4.22±0.06b | 4.21±0.15b | 3.91±0.07c |
| GH2 | 3.40±0.01b | 3.55±0.05a | 3.57±0.03a | 3.54±0.04a |
| GH39 | 3.35±0.02b | 3.51±0.05ab | 3.56±0.15a | 3.65±0.13a |
| GH51 | 1.27±0.02c | 1.48±0.04ab | 1.56±0.12a | 1.33±0.16bc |
| GH67 | 0.38±0.01b | 0.40±0.01b | 0.44±0.04a | 0.39±0.01b |
| GH74 | 9.65±0.08a | 9.49±0.05b | 9.39±0.09bc | 9.24±0.09c |
| Cellulose | CBM2 | 0.13±0.02b | 0.21±0.03a | 0.16±0.03ab | 0.19±0.06ab |
| GH1 | 3.42±0.06a | 3.17±0.04ab | 3.19±0.29ab | 3.05±0.11b |
| GH3 | 3.79±0.09b | 3.88±0.04b | 4.04±0.09a | 4.06±0.03a |
| GH5 | 1.12±0.00a | 1.09±0.05a | 1.13±0.02a | 0.83±0.05b |
| GH6 | 0.27±0.04b | 0.29±0.01ab | 0.30±0.01ab | 0.33±0.03a |
| Chitin | GH18 | 1.01±0.02b | 1.08±0.01b | 1.03±0.08b | 1.19±0.03a |
| GH19 | 0.069±0.00b | 0.082±0.00a | 0.083±0.01a | 0.076±0.01ab |
| GH20 | 0.89±0.03b | 0.89±0.03b | 0.98±0.03a | 0.92±0.03b |
| Glucans | GH128 | 0.17±0.00b | 0.18±0.01ab | 0.19±0.00a | 0.18±0.01a |
| GH17 | 0.15±0.01d | 0.18±0.01c | 0.25±0.01a | 0.20±0.02b |
| GH55 | 0.58±0.00b | 0.62±0.01a | 0.60±0.04ab | 0.62±0.02ab |
| Peptidoglycan | GH102 | 0.34±0.01a | 0.32±0.01b | 0.33±0.00ab | 0.31±0.01b |
| GH103 | 0.88±0.01b | 0.93±0.03b | 0.91±0.02b | 1.10±0.04a |
| GH23 | 4.01±0.13a | 3.67±0.02b | 3.68±0.06b | 3.70±0.06b |
| GH25 | 0.56±0.02b | 0.78±0.01a | 0.77±0.01a | 0.81±0.06a |
| GH73 | 0.15±0.01b | 0.14±0.01b | 0.19±0.01a | 0.19±0.02a |
| Lignin | AA1 | 5.93±0.13b | 6.16±0.09a | 5.81±0.12b | 5.98±0.10ab |
| AA3 | 7.86±0.01a | 7.58±0.06b | 7.54±0.03bc | 7.45±0.05c |
| AA5 | 2.39±0.08b | 2.94±0.12a | 2.93±0.15a | 2.41±0.12b |
| AA7 | 7.47±0.06a | 7.16±0.04b | 7.14±0.03b | 6.97±0.24b |
| Incorporation stage | Hemicellulose | CE1 | 14.26±0.14b | 14.19±0.2b | 14.77±0.19a | 14.61±0.05a |
| GH16 | 0.76±0.05b | 0.82±0.02a | 0.84±0.03a | 0.84±0.03a |
| GH2 | 3.79±0.07a | 3.31±0.09c | 3.55±0.15b | 3.34±0.02c |
| GH26 | 0.52±0.04b | 0.48±0.01b | 0.62±0.04a | 0.50±0.02b |
| GH36 | 0.95±0.04b | 0.97±0.06b | 1.06±0.03a | 0.93±0.01b |
| GH39 | 3.29±0.11b | 3.76±0.06a | 3.94±0.12a | 3.81±0.18a |
| GH51 | 1.34±0.01a | 1.24±0.04b | 1.25±0.03b | 1.15±0.02c |
| GH67 | 0.38±0.03a | 0.36±0.02ab | 0.32±0.03b | 0.36±0.02ab |
| GH74 | 8.69±0.12a | 8.31±0.1b | 8.45±0.13ab | 8.55±0.23ab |
| GH95 | 0.49±0.06a | 0.45±0.04ab | 0.45±0.04ab | 0.38±0.04b |
| Cellulose | GH1 | 3.68±0.17a | 3.30±0.12b | 3.50±0.28ab | 3.82±0.13a |
| GH115 | 0.20±0.01a | 0.22±0.02a | 0.13±0.02c | 0.16±0.01b |
| GH12 | 0.09±0.02b | 0.09±0.01b | 0.11±0.03ab | 0.13±0.01a |
| GH5 | 1.28±0.02a | 1.16±0.05b | 1.01±0.02c | 1.15±0.02b |
| GH6 | 0.26±0.01b | 0.27±0.01ab | 0.33±0.05a | 0.33±0.04a |
| GH8 | 0.14±0.01a | 0.11±0.01b | 0.13±0.01ab | 0.13±0ab |
| GH9 | 0.46±0.03a | 0.47±0.02a | 0.43±0.03ab | 0.4±0.02b |
| Chitin | GH18 | 1.02±0.01b | 1.04±0.03ab | 1.07±0.00a | 1.07±0.01a |
| GH19 | 0.06±0.01c | 0.08±0.01b | 0.06±0.01c | 0.10±0.01a |
| GH20 | 0.99±0.02b | 0.97±0.03b | 1.09±0.06a | 0.96±0.00b |
| Glucans | GH128 | 0.18±0.00b | 0.19±0.01ab | 0.19±0.01ab | 0.20±0.01a |
| GH17 | 0.15±0.01b | 0.18±0.00a | 0.18±0.01a | 0.19±0.01a |
| GH55 | 0.61±0.01a | 0.59±0.01b | 0.58±0.01b | 0.59±0.01ab |
| Peptidoglycan | GH103 | 0.93±0.02b | 1.14±0.05a | 1.14±0.05a | 1.18±0.05a |
| GH23 | 3.86±0.03b | 3.97±0.08ab | 3.98±0.05ab | 4.04±0.07a |
| GH25 | 0.52±0.00c | 0.57±0.03b | 0.59±0.01ab | 0.62±0.03a |
| GH108 | 0.14±0.01b | 0.11±0.01c | 0.15±0.00ab | 0.17±0.01a |
| GH73 | 0.14±0.01b | 0.15±0.00b | 0.19±0.02a | 0.15±0.00b |
| Lignin | AA1 | 5.87±0.09a | 5.98±0.06a | 5.47±0.13b | 5.61±0.05b |
| AA2 | 1.5±0.05c | 1.54±0.03bc | 1.62±0.06ab | 1.69±0.04a |
|  | AA7 | 7.55±0.23a | 7.24±0.18b | 7.33±0.09ab | 7.61±0.09a |

Table S7 Changes in soil chemical properties and microbial metabolic activity under different green manure treatments. Abbreviations are same as described in Table S1. Values represent means ± SD (n = 3). Different lowercase letters indicate significant differences among green manure types (*p* < 0.05). TN: total nitrogen; AK: available potassium; AP: available phosphorus; DON: dissolved organic nitrogen; PON: particulate organic nitrogen; MBN: microbial biomass nitrogen. mPOC and mMAOC represent the mass proportions (%) of POC and MAOC relative to their combined total. AG: α-glucosidase; BG: β-glucosidase; CL: cellobiohydrolase; XYL: β-xylosidase; POD: peroxidase; PPO: polyphenol oxidase; MR: microbial respiration; qCO₂: metabolic quotient; qMB: microbial quotient. Enzyme activity unit: U g⁻¹.

| Stage | Cultivation stage | | | | Incorporation stage | | | |
| --- | --- | --- | --- | --- | --- | --- | --- | --- |
| CK | CJ | CP | SC | CK | CJ | CP | SC |
| pH | 6.21±0.01c | 6.28±0.01b | 6.29±0.03b | 6.41±0.05a | 6.22±0.02c | 6.44±0.07b | 6.52±0.06ab | 6.63±0.10a |
| AP (mg kg⁻¹) | 66.43±5.60c | 68.60±1.87bc | 75.76±3.59b | 85.91±5.18a | 83.43±2.12c | 87.78±9.70bc | 95.97±3.88b | 111.11±6.57a |
| TN (g kg⁻¹) | 1.02±0.07b | 1.05±0.07b | 1.05±0.09b | 1.25±0.09a | 1.08±0.05c | 1.16±0.07bc | 1.19±0.06ab | 1.27±0.04a |
| PON (g kg⁻¹) | 0.16±0.04a | 0.15±0.00a | 0.18±0.05a | 0.20±0.03a | 0.16±0.08a | 0.16±0.04a | 0.19±0.05a | 0.18±0.03a |
| AK (mg kg⁻¹) | 66.61±0.94d | 85.06±2.87c | 128.00±7.36b | 141.63±2.39a | 61.83±17.32c | 151.06±2.10b | 215.21±10.17a | 203.09±12.29a |
| DON (mg kg⁻¹) | 7.17±0.53b | 7.55±0.79b | 8.13±0.50ab | 8.77±0.14a | 7.27±0.48c | 10.28±0.20b | 11.53±0.80a | 11.72±0.50a |
| MBN (mg kg⁻¹) | 13.84±0.80b | 16.12±1.71a | 16.32±1.07a | 16.64±0.80a | 12.77±1.41b | 13.94±1.15b | 15.06±0.93b | 19.53±2.32a |
| C: N | 8.62±0.72ab | 9.07±0.48a | 9.26±0.43a | 7.89±0.28b | 7.60±0.53a | 8.82±0.92a | 9.60±2.92a | 9.69±1.04a |
| MBC: MBN | 9.89±0.63a | 10.54±0.96a | 11.03±0.70a | 10.82±0.27a | 12.39±1.06b | 12.56±1.24ab | 14.54±2.26a | 12.08±1.93c |
| mPOC | 30.85±2.49a | 32.16±4.88a | 33.98±4.10a | 34.56±2.19a | 38.95±4.57a | 32.40±3.52a | 37.73±10.62a | 36.25±6.21a |
| mMAOC | 69.15±2.49a | 67.84±4.88a | 66.02±4.10a | 65.44±2.19a | 61.05±4.57a | 67.60±3.52a | 62.27±10.62a | 63.75±6.21a |
| AG | 10.42±0.27b | 11.41±0.45ab | 12.45±1.54a | 11.56±0.40ab | 11.86±1.02a | 11.06±1.16a | 13.32±2.23a | 13.43±2.38a |
| BG | 15.20±0.16b | 15.92±0.54a | 16.12±0.45a | 15.59±0.08ab | 15.84±0.06ab | 15.12±0.28b | 16.04±0.79ab | 16.13±0.43a |
| CL | 9.09±0.95b | 11.13±0.53a | 11.31±0.67a | 11.90±0.50a | 10.20±0.46b | 11.01±0.51b | 12.55±0.85a | 12.65±0.90a |
| POD | 9.55±0.19a | 10.85±0.92a | 10.65±1.43a | 10.75±0.07a | 10.65±1.12c | 12.52±1.99bc | 14.81±1.95ab | 17.27±0.66a |
| PPO | 369.64±16.36a | 357.72±7.90ab | 352.94±7.40ab | 343.65±10.90b | 388.44±3.43a | 349.28±24.23b | 356.13±5.19b | 352.46±19.20b |
| XYL | 6.22±0.44a | 6.60±0.25a | 6.74±0.81a | 6.37±0.43a | 6.61±0.52a | 6.01±0.43a | 5.82±0.96a | 6.04±0.54a |
| MR (mg kg⁻¹) | 43.14±3.48b | 47.52±3.87ab | 57.92±4.47ab | 62.60±1.24a | 49.04±5.27b | 53.88±9.75b | 72.84±11.28a | 78.21±8.52a |
| qCO2 | 0.30±0.02ab | 0.28±0.02b | 0.32±0.02a | 0.35±0.00a | 0.31±0.02a | 0.31±0.06a | 0.33±0.03a | 0.33±0.03a |
| qMB | 15.56±1.08b | 17.76±0.48a | 18.53±1.05a | 18.32±0.48a | 19.27±0.09a | 17.08±0.97a | 19.35±2.67a | 19.00±1.36a |

Table S8 Above-ground fresh biomass and nutrient contents of different green manures in 2022. Values represent means ± SD (n = 3). Different lowercase letters indicate significant differences among green manure types (*p* < 0.05).

| Plant indicators | Biomass  (t hm⁻²) | TN  (g kg⁻¹) | TP  (g kg⁻¹) | TK  (g kg⁻¹) |
| --- | --- | --- | --- | --- |
| *Crotalaria juncea* | 22.43±0.40a | 24.33±0.41b | 5.15±0.18a | 19.46±1.07b |
| *Crotalaria pallida* | 11.33±0.98b | 36.01±1.98a | 4.56±0.22ab | 29.21±1.50a |
| *Sesbania cannabina* | 3.31±0.04c | 23.78±0.65b | 5.16±0.21a | 21.64±1.07b |

Figure_S1 Differential bacterial and fungal taxa identified by LEfSe under different green manure treatments during the cultivation (A, B) and incorporation (C, D) stages. Nodes with no significant differences in the figure are shown in no color, while nodes representing biomarkers are colored according to their respective treatments: CK (blue), CJ (yellow), CP (green), and SC (red). Abbreviations are same as described in Table S1. The legend on the right lists the taxonomic units labeled with letters, showing only those taxonomic units with LDA > 3.0 (*p* < 0.05). Circles from the innermost to the outermost layers represent taxonomic levels from phylum to genus. Each small circle on a branch denotes a taxon at the corresponding level, and the diameter of each circle is proportional to its relative abundance.


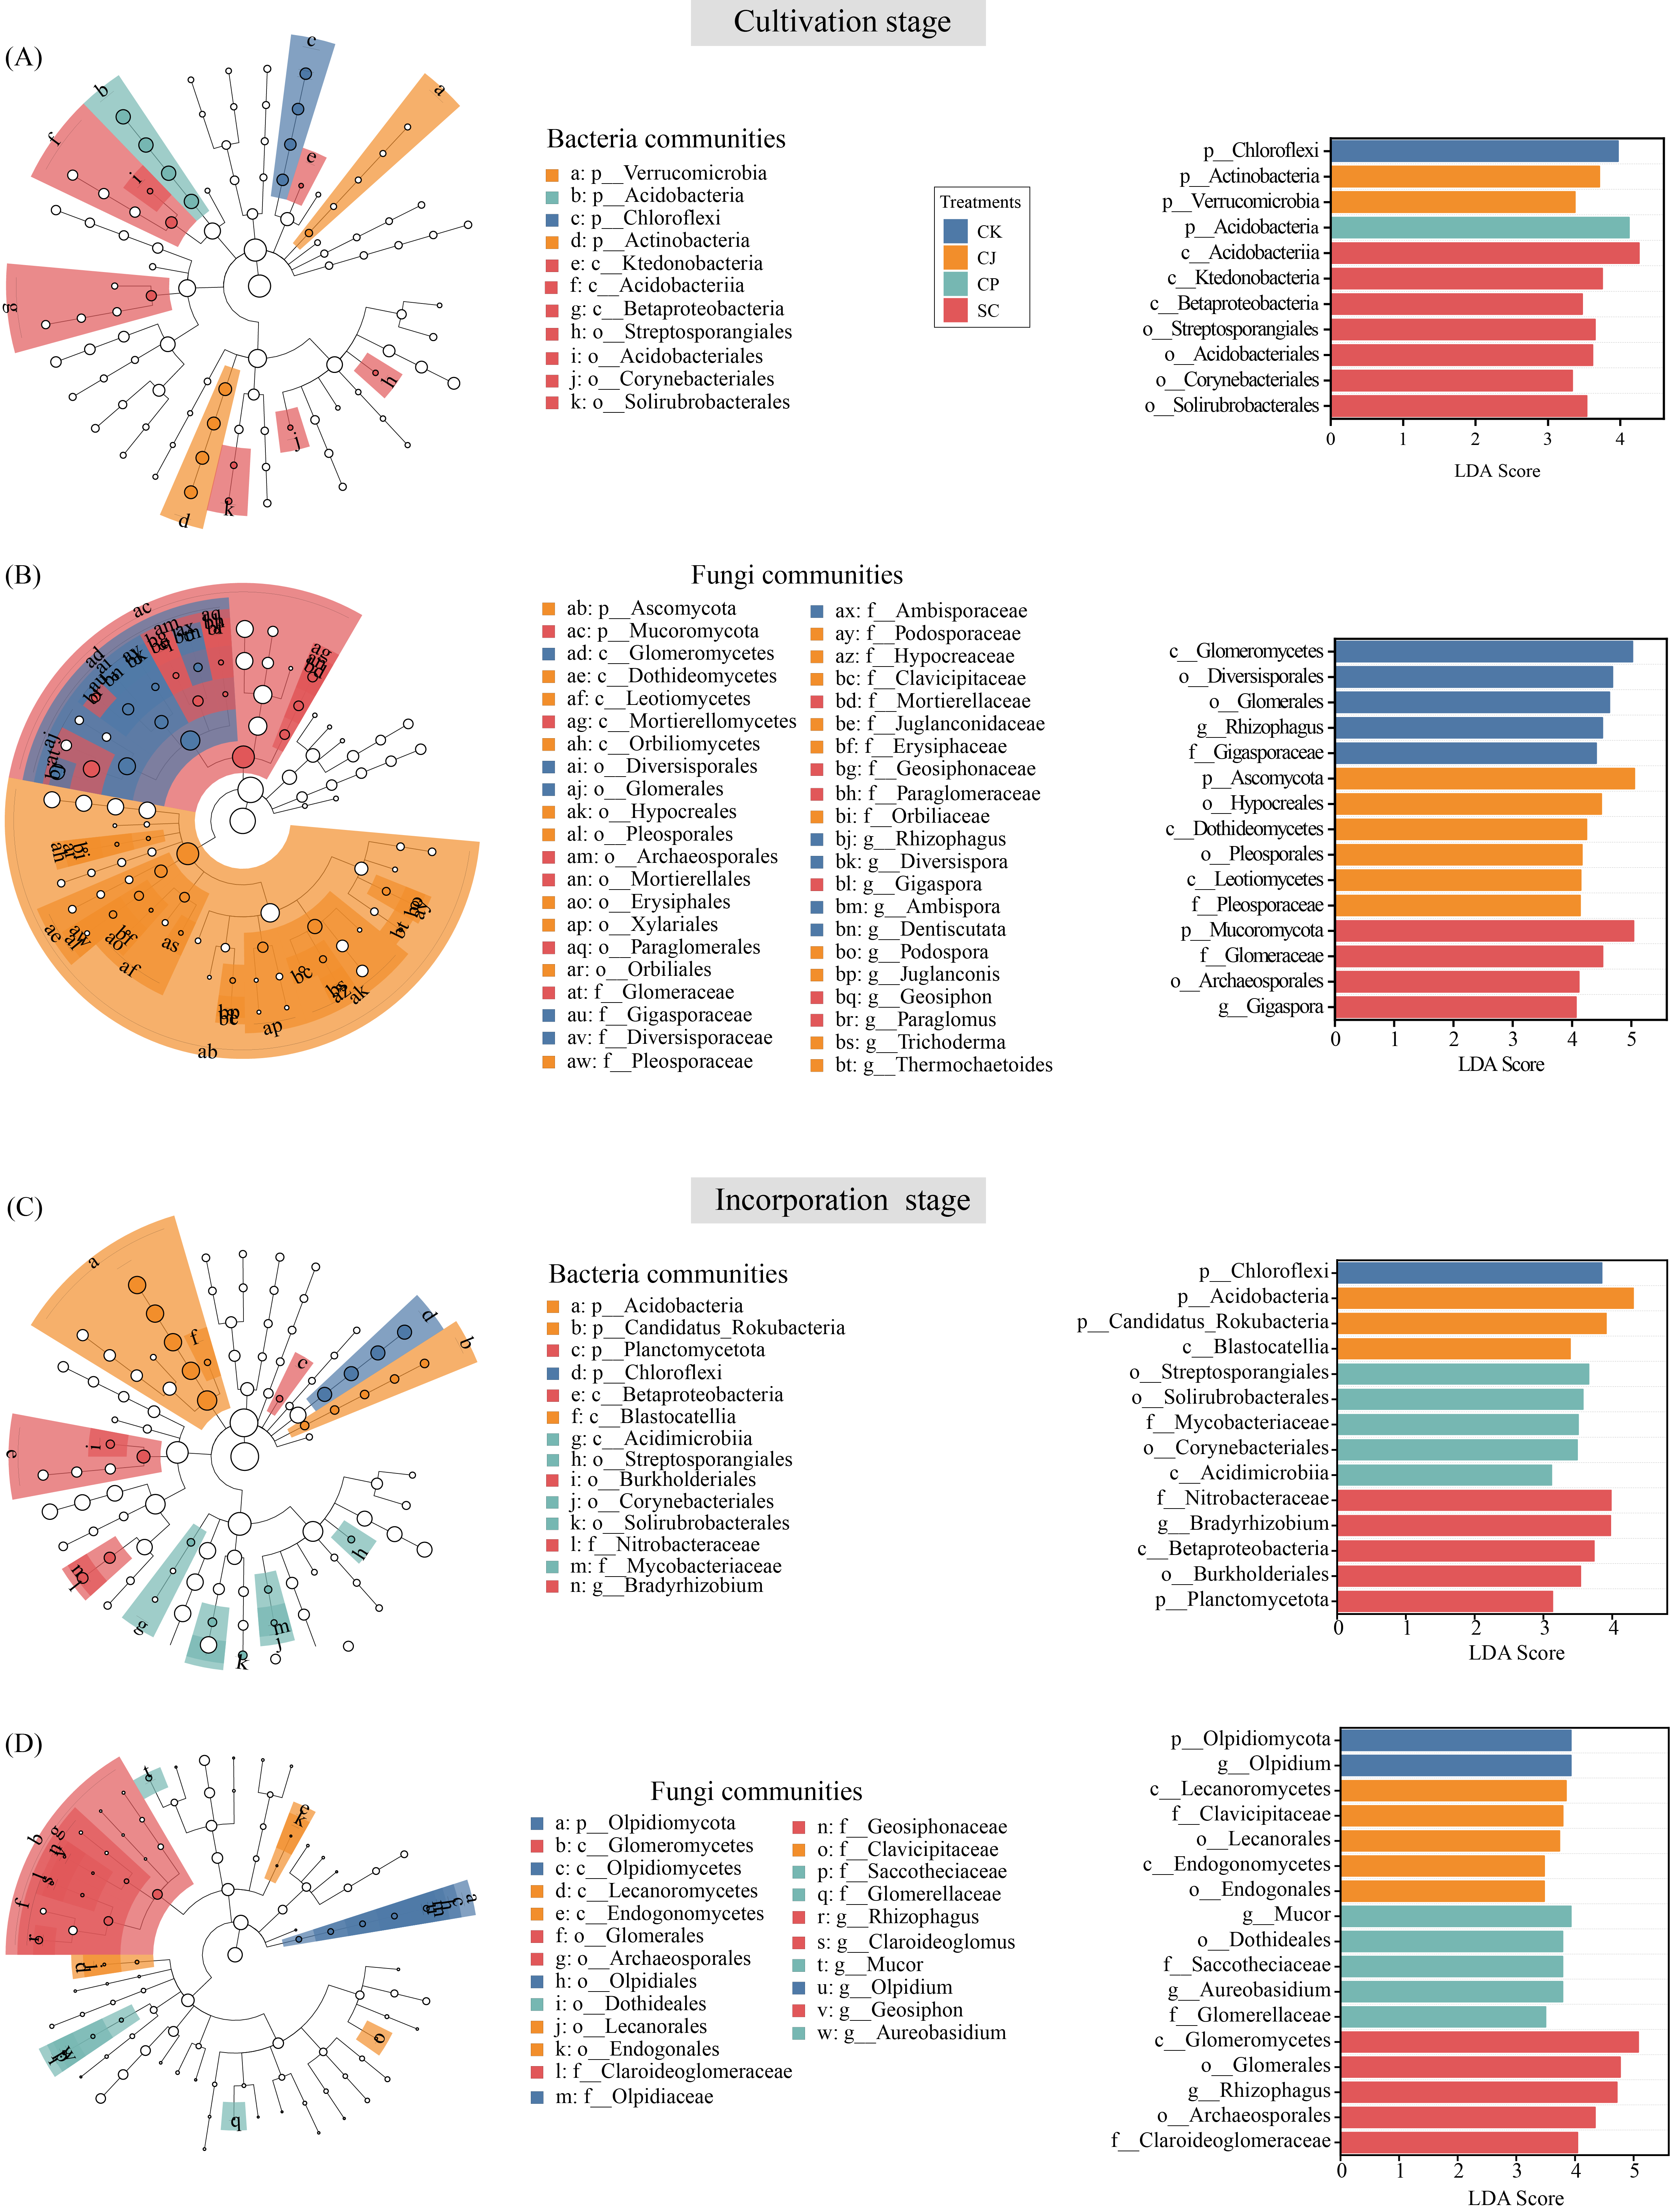


Figure_S2 Non-metric Multidimensional Scaling (NMDS) analysis of CAZyme functional gene families based on Bray–Curtis distances of soil bacterial and fungal community samples. Stress measures the goodness-of-fit of the NMDS analysis, with values below 0.2 generally considered to indicate a meaningful representation. Abbreviations are same as described in Table S1. CS: cultivation stage; IS: incorporation stage.


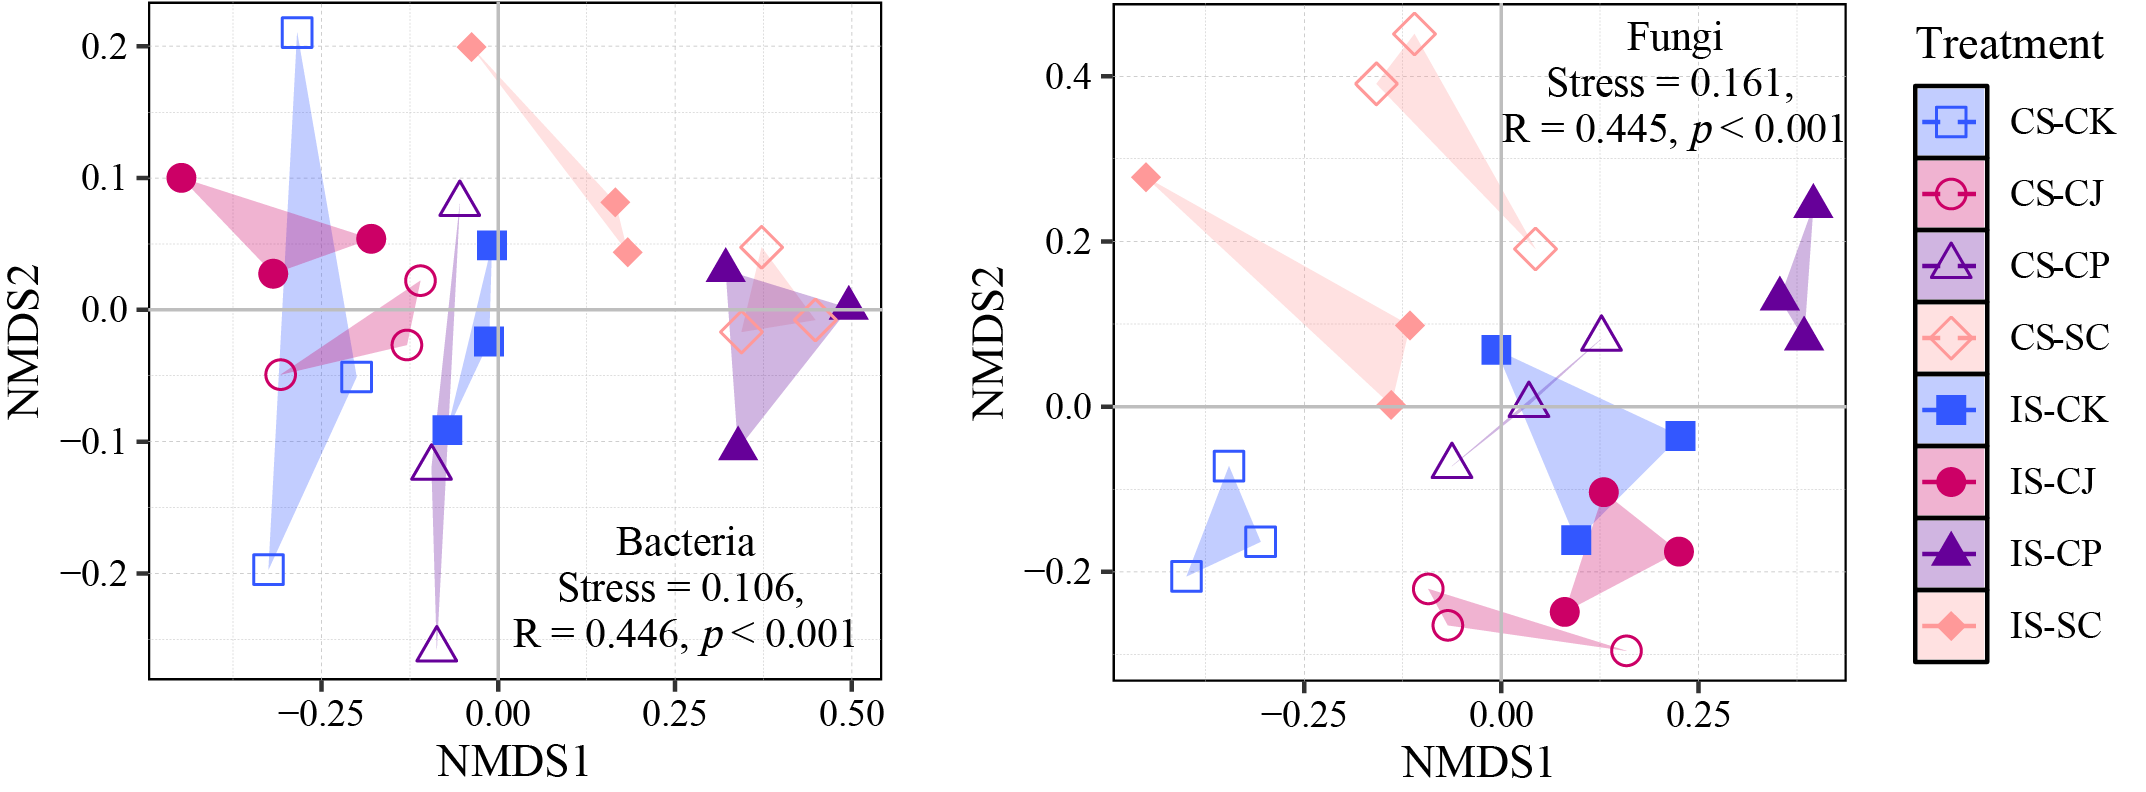


Figure_S3 Log-linear relationships between soil extracellular enzyme activities and the abundances of their corresponding CAZyme genes (log₁₀-transformed). Abbreviations are same as described in Table S1 and S7.


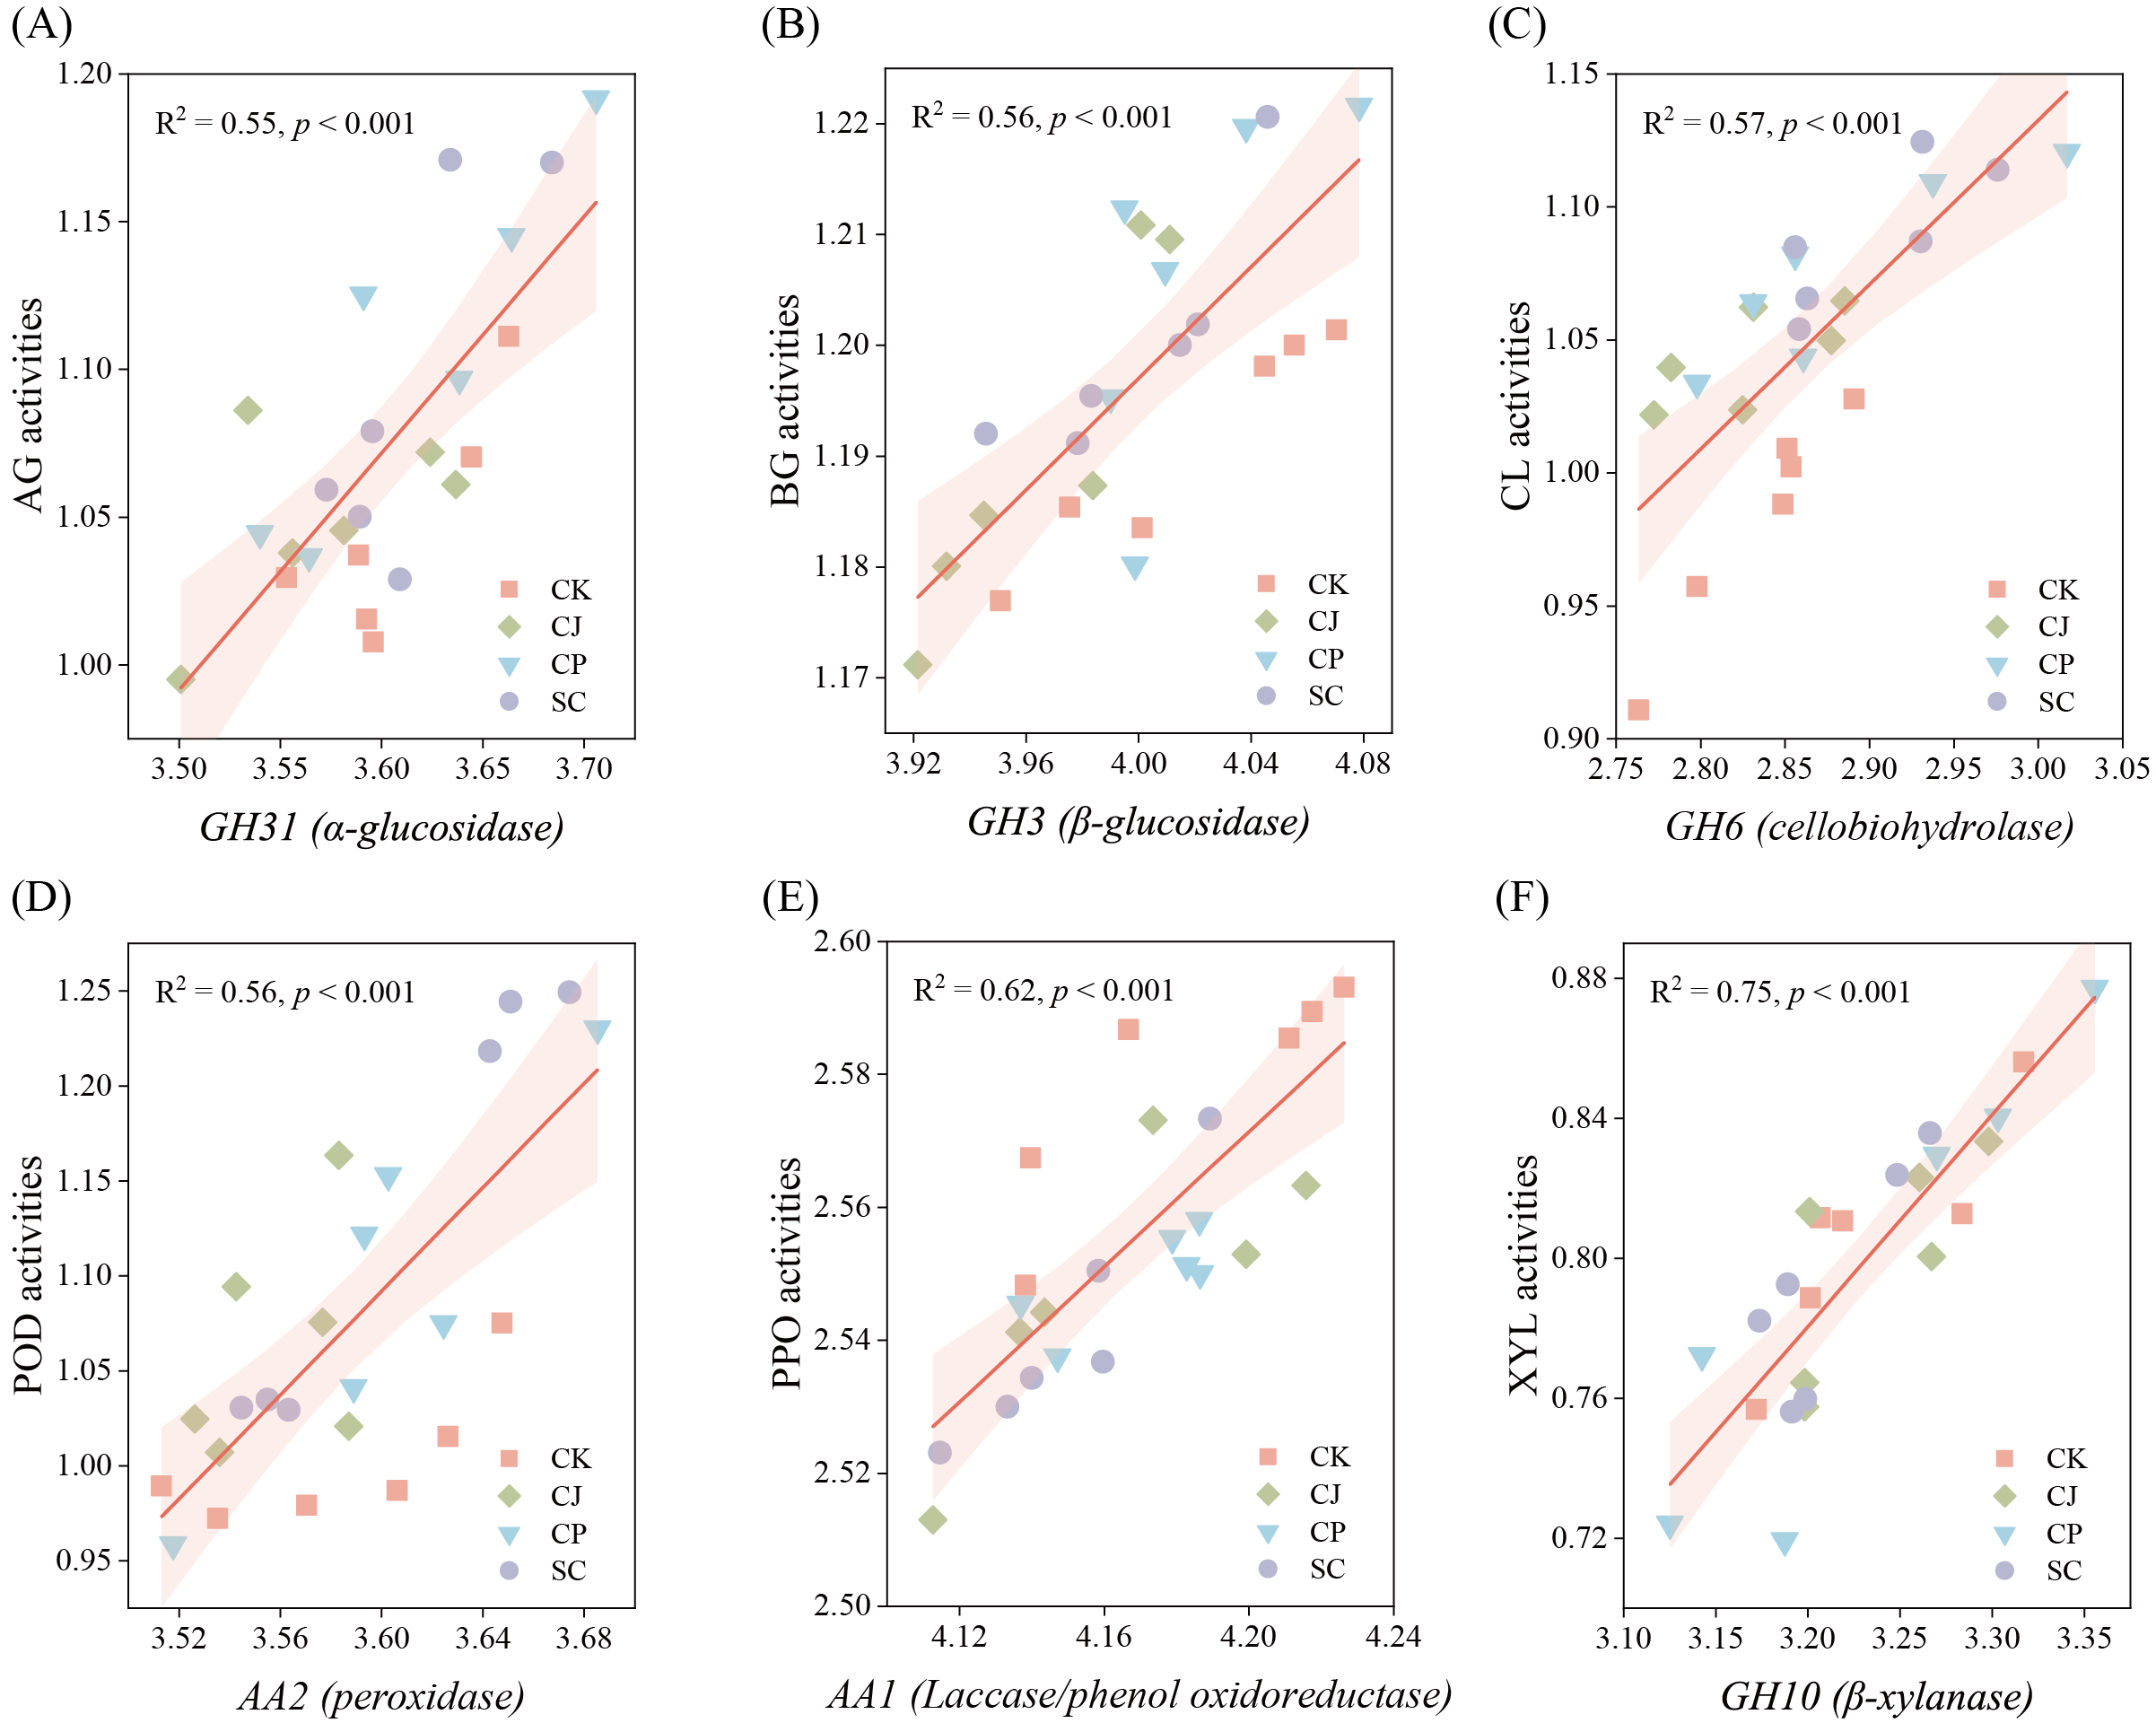

Supplement: Supplementary file 1 [file ae65b4683d965d570d01f3c4.docx]
